# Supplementary material for: Increasing Temperature Alters the Effects of Extracellular Copper on Thalassiosira Pseudonana Physiology and Transcription
Source: MDPI journal article supplement (doi:10.3390/jmse9080816), 2021-07-28
Supplement: s1 [file s1]

Supplemental Table 1: Aquil Medium

| Aquil Medium                                       |                |
|----------------------------------------------------|----------------|
| substance                                          | Initial weight |
| NaCl                                               | 24.36 g        |
| MgCl <sub>2</sub> ·6H <sub>2</sub> O               | 11.03 g        |
| KCl                                                | 0.7 g          |
| Na <sub>2</sub> SO <sub>4</sub>                    | 4.09 g         |
| CaCl <sub>2</sub> ·2H <sub>2</sub> O               | 1.0 g          |
| NaNO <sub>3</sub>                                  | 8.5 mg         |
| NaH <sub>2</sub> PO <sub>4</sub> ·H <sub>2</sub> O | 0.5 mg         |
| NaHCO <sub>3</sub>                                 | 0.2 g          |
| KBr                                                | 10.0 mg        |
| NaF                                                | 3.0 mg         |
| Na <sub>2</sub> EDTA·2H <sub>2</sub> O             | 5 mg           |
| PIV micronutrients solution                        | 0.5 ml         |
| ddH <sub>2</sub> O                                 | 1.0 L          |

| PIV micronutrients solution           |                |
|---------------------------------------|----------------|
| substance                             | Initial weight |
| Na <sub>2</sub> EDTA                  | 0.750 g        |
| MnCl <sub>2</sub> ·4H <sub>2</sub> O  | 0.041 g        |
| ZnCl                                  | 0.005 g        |
| NaMoO <sub>4</sub> ·2H <sub>2</sub> O | 0.004 g        |
| CoCl <sub>2</sub> ·6H <sub>2</sub> O  | 0.002 g        |
| FeCl <sub>3</sub> ·6H <sub>2</sub> O  | 0.097 g        |
| ddH <sub>2</sub> O                    | 1.0 L          |

Supplemental Table 2: Cell density (cell \*10<sup>5</sup> mL<sup>-1</sup>) of *Thalassiosira pseudonana* during 3-day (n = 3)

| Cu (nM) | 20°C  |       | 25°C  |       |
|---------|-------|-------|-------|-------|
|         | Day 0 | Day3  | Day 0 | Day3  |
| 0       | 3.74  | 6.912 | 2.486 | 15.71 |
|         | 3.68  | 5.62  | 3.079 | 15.31 |
|         | 3.68  | 5.936 | 2.793 | 15.37 |
|         | 3.504 | 9.306 | 1.779 | 14.81 |
| 19.6    | 4.46  | 9.442 | 2.378 | 16.34 |
|         | 3.731 | 8.758 | 2.909 | 15.22 |
|         | 4.009 | 9.652 | 2.229 | 14.46 |
|         | 3.805 | 10.73 | 1.917 | 15.63 |
| 160     | 3.882 | 10.44 | 2.538 | 15.47 |
|         | 3.862 | 7.857 | 2.621 | 17.06 |
|         | 3.264 | 8.55  | 2.202 | 15.17 |
|         | 3.567 | 8.236 | 2.163 | 13.34 |
| 800     | 3.274 | 6.578 | 2.393 | 16.88 |
|         | 3.134 | 6.196 | 2.587 | 16.31 |
|         | 3.23  | 6.42  | 2.383 | 17.46 |
|         |       |       |       |       |

Supplemental Table 3: Significance test results of growth rate, Chla, Chlc, Caro, Fv/Fm, yield, NPQ, Cu concentrations, POC: Chla for effects among Temperature and Cu concentrations after 3-day based on the 2-way ANOVA (MANOVA, LSD tests). The limit of significance was set at 95%

| Source of variation | Temperature | Cu     | T & Cu | Temperature | Cu    | T & Cu |
|---------------------|-------------|--------|--------|-------------|-------|--------|
|                     | <i>F</i>    |        |        | <i>P</i>    |       |        |
| Growth rate         | 145.828     | 4.309  | 0.886  | 0.000       | 0.011 | 0.490  |
| Chla (pg/cell)      | 33.066      | 3.715  | 1.427  | 0.000       | 0.020 | 0.262  |
| Chlc (pg/cell)      | 65.17       | 1.46   | 3.22   | 0.000       | 0.252 | 0.034  |
| Caro (pg/cell)      | 246.137     | 2.046  | 2.349  | 0.000       | 0.126 | 0.089  |
| Fv/Fm               | 168.7       | 13.056 | 9.044  | 0.000       | 0.000 | 0.000  |
| yield               | 35.750      | 6.379  | 3.695  | 0.000       | 0.002 | 0.021  |
| NPQ                 | 0.244       | 9.773  | 1.561  | 0.627       | 0.000 | 0.223  |
| Cu (fg/cell)        | 11.604      | 33.988 | 2.198  | 0.003       | 0.000 | 0.106  |
| POC: Chla           | 8.128       | 9.480  | 0.665  | 0.010       | 0.000 | 0.624  |
